# Supplementary material for: Effectiveness of legislative changes obligating notification of prolonged sickness absence and assessment of remaining work ability on return to work and work participation: a natural experiment in Finland
Source: HighWire-hosted journal article supplement (doi:10.1136/oemed-2015-103131), 2015-10-13
Supplement: oemed-2015-103131supp.pdf [file oemed-2015-103131supp.pdf]

## **Supplemental Material**

Effectiveness of legislative changes obligating notification of prolonged sickness absence and assessment of remaining work ability on return to work and work participation: a natural experiment in Finland

J I Halonen, S Solovieva, J Pentti, M Kivimäki, J Vahtera, E Viikari-Juntura

**Supplemental Table 1.** Descriptive statistics of the source population with permanent job contract by years.

|                                                 | <b>2008</b>      | <b>2009</b>      | <b>2010</b>      | <b>2011</b>      | <b>2012</b>      | <b>2013</b>      | <b>2014</b>      |
|-------------------------------------------------|------------------|------------------|------------------|------------------|------------------|------------------|------------------|
| Total n                                         | 78 029           | 78 742           | 77 056           | 77 498           | 77 516           | 79 922           | 79 383           |
| Age, mean years (95% CI)                        | 46.8 (46.7-46.9) | 46.9 (46.8-47.0) | 47.1 (46.9-47.2) | 47.0 (46.9-47.1) | 46.6 (46.5-46.7) | 47.0 (46.9-47.1) | 47.2 (47.1-47.3) |
| Women, n (%)                                    | 57 741 (74.0)    | 58 742 (74.6)    | 58 023 (75.3)    | 58 511 (75.5)    | 58 982 (76.1)    | 60 821 (76.1)    | 60 648 (76.4)    |
| Low job status, n (%)                           | 46 694 (59.8)    | 47 403 (60.2)    | 46 390 (60.2)    | 47 028 (60.7)    | 49 300 (63.6)    | 50 136 (62.7)    | 49 884 (62.8)    |
| Practical nurses, n (%)                         | 7450 (9.8)       | 7846 (10.2)      | 7810 (10.3)      | 7916 (10.4)      | 8 185 (10.6)     | 8544 (11.0)      | 8530 (11.0)      |
| Sickness absence rate, * % (95% CI)             | 5.4 (5.3-5.5)    | 5.0 (4.9-5.1)    | 5.1 (5.0-5.2)    | 5.1 (5.0-5.2)    | 4.8 (4.7-4.9)    | 4.7 (4.6-4.8)    | 4.5 (4.4-4.6)    |
| Those, n (%) with                               |                  |                  |                  |                  |                  |                  |                  |
| At least one short absence (1-7 days)           | 49 002 (62.8)    | 50 474 (64.1)    | 49 470 (64.2)    | 49 289 (63.6)    | 50 075 (64.6)    | 50 910 (63.7)    | 51 440 (64.8)    |
| At least one absence with 30+ days <sup>†</sup> | 6790 (8.7)       | 6486 (8.2)       | 6502 (8.4)       | 6319 (8.2)       | 5 814 (7.5)      | 6065 (7.6)       | 5592 (7.0)       |
| At least one absence with 60+ days <sup>‡</sup> | 1925 (2.5)       | 1800 (2.3)       | 1844 (2.4)       | 1825 (2.4)       | 1 628 (2.1)      | 1776 (2.2)       | 1443 (1.8)       |
| At least one absence with 90+ days <sup>‡</sup> | 1203 (1.5)       | 1070 (1.4)       | 1096 (1.4)       | 1079 (1.4)       | 930 (1.2)        | 990 (1.2)        | 744 (0.9)        |

\*Absence days/days at risk

<sup>†</sup>Calendar days<sup>‡</sup>Compensated sickness absence days

**Supplemental Table 2.** Comparison of participants included in and excluded from trajectory analyses by study periods.

|                                                              | Study period     |                  |                  |                  |                  |                  |
|--------------------------------------------------------------|------------------|------------------|------------------|------------------|------------------|------------------|
|                                                              | 2008/2009        |                  | 2010/2011        |                  | 2013/2014        |                  |
|                                                              | Excluded         | Included         | Excluded         | Included         | Excluded         | Included         |
| <b><i>30 calendar SA days</i></b>                            |                  |                  |                  |                  |                  |                  |
| Total n (%)                                                  | 2132 (33.3)      | 4261 (66.7)      | 2125 (35.4)      | 3886 (64.6)      | 2025 (35.5)      | 3683 (64.5)      |
| Age, mean years (95% CI)                                     | 48.2 (47.7-48.7) | 50.3 (50.0-50.5) | 48.3 (47.8-48.8) | 50.5 (50.3-50.8) | 48.0 (47.5-48.5) | 50.7 (50.5-51.0) |
| Women, n (%)                                                 | 1740 (81.5)      | 3120 (73.2)      | 1761 (82.8)      | 2885 (73.5)      | 1708 (84.2)      | 2790 (75.8)      |
| Low job status, n (%)                                        | 1261 (59.1)      | 1923 (45.1)      | 1282 (60.3)      | 1822 (46.9)      | 1218 (60.1)      | 1849 (50.2)      |
| Practical nurses, n (%)                                      | 314 (15.0)       | 527 (12.4)       | 375 (17.6)       | 504 (13.0)       | 414 (20.4)       | 518 (14.1)       |
| Timing of sustainable RTW*, days (median, IQR <sup>†</sup> ) | 38.0 (13.0-118)  | 26.0 (10.0-61.0) | 38.0 (12.0-118)  | 26.0 (10.0-62.0) | 39.0 (14.0-110)  | 26.0 (10.0-63.0) |
| <b><i>60 compensated SA days</i></b>                         |                  |                  |                  |                  |                  |                  |
| Total n (%)                                                  | 806 (48.7)       | 849 (51.3)       | 765 (50.0)       | 765 (50.0)       | 724 (48.9)       | 757 (51.1)       |
| Age, mean years (95% CI)                                     | 52.5 (51.8-53.1) | 51.0 (50.5-51.6) | 52.4 (51.7-53.1) | 51.0 (50.3-51.6) | 50.8 (50.0-51.5) | 51.5 (50.9-52.1) |
| Women, n (%)                                                 | 626 (77.6)       | 594 (70.0)       | 596 (77.9)       | 544 (71.1)       | 591 (81.6)       | 567 (74.9)       |
| Low job status, n (%)                                        | 452 (56.1)       | 348 (42.0)       | 453 (59.2)       | 340 (44.4)       | 434 (59.9)       | 342 (45.1)       |
| Practical nurses, n (%)                                      | 107 (13.3)       | 96 (11.3)        | 112 (14.6)       | 108 (14.1)       | 141 (19.5)       | 120 (15.8)       |
| Timing of sustainable RTW*, days (median, IQR <sup>†</sup> ) | 93.0 (36.0-179)  | 54.0 (17.0-101)  | 85.0 (35.0-184)  | 50.0 (17.0-113)  | 78.0 (29.0-162)  | 41.0 (15.0-119)  |
| <b><i>90 compensated SA days</i></b>                         |                  |                  |                  |                  |                  |                  |
| Total n (%)                                                  | 530 (56.9)       | 402 (43.1)       | 501 (59.1)       | 346 (40.9)       | 434 (56.7)       | 332 (43.3)       |
| Age, mean years (95% CI)                                     | 53.2 (52.5-53.9) | 51.8 (51.0-52.5) | 52.8 (52.0-53.6) | 50.2 (49.4-51.1) | 51.6 (50.6-52.5) | 51.0 (50.2-51.9) |
| Women, n (%)                                                 | 410 (77.2)       | 286 (71.1)       | 379 (75.6)       | 254 (73.4)       | 353 (81.3)       | 244 (73.5)       |
| Low job status, n (%)                                        | 290 (54.7)       | 162 (40.3)       | 279 (55.7)       | 142 (41.0)       | 264 (60.8)       | 144 (43.4)       |
| Practical nurses, n (%)                                      | 68 (12.8)        | 49 (12.2)        | 75 (15.0)        | 45 (13.0)        | 84 (19.4)        | 56 (16.9)        |
| Timing of sustainable RTW*, days (median, IQR <sup>†</sup> ) | 96.0 (37.0-189)  | 51.0 (22.0-123)  | 79.0 (35.0-195)  | 56.0 (20.0-125)  | 75.0 (37.0-159)  | 71.0 (24.0-149)  |

\* RTW= return to work, <sup>†</sup> IQR= interquartile range

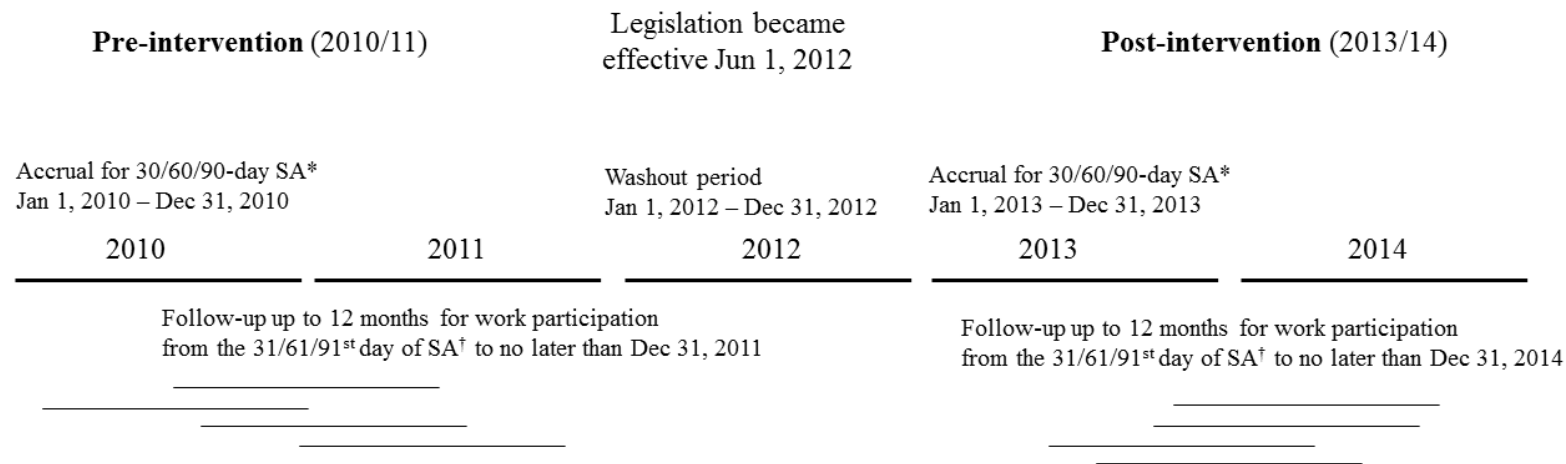

**Supplemental Figure 1.** Selection of the sickness absence accrual and follow-up periods for the pre- and post-intervention period. The horizontal lines at the bottom indicate follow-up periods for hypothetical individuals.

\* corresponding to 30, 81, and 116 calendar days

† corresponding to 31<sup>st</sup>, 82<sup>nd</sup>, and 117<sup>th</sup> calendar day
